# Supplementary material for: Demographic response of cutlassfish (Trichiurus japonicus and T. nanhaiensis) to fluctuating palaeo-climate and regional oceanographic conditions in the China seas
Source: PubMed Central journal article supplement — Sci Rep. 2014 Sep 16;4:6380. doi: 10.1038/srep06380 (PMC4165270; doi:10.1038/srep06380), 2014-09-16
Supplement: srep06380-s1.pdf [file srep06380-s1.pdf]

**Supplementary Information for**

**“Demographic response of cutlassfish (*Trichiurus japonicus* and *T. nanhaiensis*)  
to fluctuating palaeo-climate and regional oceanographic conditions in the China  
seas”**

Lijun He<sup>1,2\*</sup>, Aibing Zhang<sup>3</sup>, David Weese<sup>4</sup>, Shengfa Li<sup>2</sup>,

Jiansheng Li<sup>2</sup> and Jing Zhang<sup>1</sup>

<sup>1</sup>State Key Laboratory of Estuarine and Coastal Research, East China Normal University, Shanghai, 200062, P. R. China,

<sup>2</sup>East China Sea Fisheries Research Institute, Chinese Academy of Fishery Sciences, Shanghai, 200090, P. R. China,

<sup>3</sup>College of Life Sciences, Capital Normal University, Beijing, 100048, P. R. China,

<sup>4</sup>Department of Ecology and Evolutionary Biology and Museum of Zoology, University of Michigan, Ann Arbor, MI 48109, USA

\* E-mail: tiger02j@hotmail.com

### **Supplementary Information S1: Molecular clock variation and calibration**

Sequence substitution rates of the mitochondrial Cyt b gene of fish have been shown to vary greatly between species. For example, molecular rates of 0.34%/myr (*Cobitis*) (Doadrio & Perdices, 2005), 0.53-0.66%/myr (Plagopterini and *Barbus*) (Dowling *et al.*, 2002; Tsigenopoulos *et al.*, 2003), and 0.9-1.2%/myr (cichlid and schizothoracine fishes) (Martin & Bermingham, 1998; He *et al.*, 2004) have all recently been reported. However, molecular rate calibrations, such as these, based on interspecific phylogenetic divergence, geologic and/or fossils evidence have been shown to be unreliable and often underestimate actual divergence due to purifying selection or mutational hot spots (Ho *et al.*, 2005; BurrIDGE *et al.*, 2008). Furthermore, recent studies have shown that short-term mtDNA evolutionary rates are elevated relative to long-term (deeper phylogenetic level) rates (Santos *et al.*, 2005; Kemp *et al.*, 2007; Crandall *et al.*, 2012). The present study indeed presents an elevated molecular rate estimation of 2.03 (1.35-2.7)%/myr for *Trichiurus* calibrated to the earliest inundation on the newly formed wide East China Sea shelf (150 kya) by rising sea level of the last interglacial period (70~140 kya).

### **Supplementary Information S2: Geological history of the China seas**

The last uplift of the Tibetan Plateau, occurring around 150 kya (Sun *et al.*, 2003), accompanied by the costal subsidence of East China is thought to have created wide and flat continental shelves in the East China Sea and northern South China Sea (Wang *et al.*, 2004). However, the absence of marine deposits during the early and middle Pleistocene suggest that these continental shelves were much narrower and

steeper prior to this event (Wang *et al.*, 1981; 1985).

### **Supplementary Information S3: Primary production difference between the East China Sea and South China Sea influenced by the rivers and monsoon**

The large differences in the influx of freshwater and terrigenous sediment between the East China Sea and northern South China Sea likely resulted in different primary productivities of these two seas. For example, the Changjiang (Yangtze River) introduces nearly  $9.54 \times 10^{11}$  m<sup>3</sup> of freshwater and  $5 \times 10^8$  tons of sediment into the East China Sea per year (Wang *et al.*, 1988); whereas as the second largest river in China, the Pearl River, only provides  $3.03 \times 10^{11}$  m<sup>3</sup> of freshwater and  $0.89 \times 10^8$  tons of sediment into the South China Sea per year (Wei & Wu, 2011; Yang *et al.*, 2011). Furthermore, the primary production of the present day northern South China Sea in summer is much lower than that in winter due to nutrient advection constraint by summer shallow thermoclines and weak vertical mixing (Tang *et al.*, 2003; Chen *et al.*, 2006), which suggest that coastal river discharge plays a less important role relative to winter monsoons in influencing the primary production of the northern South China Sea.

### **Supplementary Information S4: Geological history of the Changjiang**

Historically, the Changjiang is thought to have drained into the East China Sea since the late Pleistocene (Zhu *et al.*, 1984; Li & Zhang, 1995). However, given the absence of Changjiang derived sediments on the ECS shelf prior to the Holocene and the decrease in salinity of the Japan Sea during the LGM, some believe the palaeo-Changjiang historically drained into the Japan Sea or did not enter the East China Sea until the Holocene (Zhao *et al.*, 1983; Zhong *et al.*, 1983; Zhao, 1984; Yang,

1991).

#### **Supplementary Information S5: Interspecific competition between *T. japonicus* and *T. nanhaiensis***

The continuous population growth of *T. japonicus* compared to the population contraction of *T. nanhaiensis* prior to 37.5 kya observed in the northern South China Sea (Fig. 5) might be attributed to limited niche space and/or inter-specific competition. In terms of dietary needs, habitat space and resource partitioning, *T. japonicus* and *T. nanhaiensis* have similar niche requirements (Lin *et al.*, 2005; Yan *et al.*, 2010). In this context, the larger population size of *T. japonicus* over the last 165 kya may have allowed it to successfully occupy much of the available niche space of the northern South China Sea and outcompete species of lower abundance like *T. nanhaiensis* (Fig. 5). With the continued population expansion of *T. japonicus* and increased interspecific competition this brought, the population size of *T. nanhaiensis* steadily declined from 165 to 37.5 kya (Fig. 5).

#### **Supplementary Information S6: Palaeo-productivity influenced by winter monsoon in the northern Southern China Sea**

Primary production in the northern South China Sea was mainly influenced by the winter monsoons. For example, present or palaeo-productivity increased due to high nutrient input from upwelling and terrestrial deposits caused by the intense winter monsoons in the northern South China Sea during winter or periods of glaciations (Fig. 5) and decreased due to low nutrient input by shallow mixing layers during summer or weaker winter monsoons during interglacial periods (Li *et al.*, 2002; Tang

*et al.*, 2003; Li & Wang, 2004; Chen & Chen, 2006; Wang *et al.*, 2007).

### **Supplementary Information S7: Link between East Asian monsoons and population dynamics in the China seas**

In the East China Sea, a general link between interglacial intensified summer monsoons, increased precipitation followed by high nutrient input from the Changjiang, high primary production and population expansions was revealed. Furthermore, the abrupt postglacial population growth experienced by the East China Sea population of *T. japonicus* provides insight into the Changjiang Delta's postglacial development since 22.5 [15-30] kya. However, contrary to conditions in the East China Sea, glacial increases and interglacial decreases of primary productivity induced by winter monsoons can explain the LGM expansion and postglacial genetic bottleneck of *T. japonicus* and *T. nanhaiensis* in the northern South China Sea.

#### **References:**

- Burridge, C. P., Craw, D., Fletcher, D. & Waters, J. M. Geological dates and molecular rates: fish DNA sheds light on time dependency. *Mol. Biol. Evol.* **25**, 624–633 (2008).
- Chen, Y. L & Chen, H. Y. Seasonal dynamics of primary and new production in the northern South China Sea: The significance of river discharge and nutrient advection. *Deep-Sea Res. Part I* **53**, 971–986 (2006).
- Crandall, E. D., Sbrocco, E. J., DeBoer, T. S., Barber, P. H. & Carpenter, K. E. Expansion dating: calibrating molecular clocks in marine species from expansions

- onto the Sunda Shelf following the Last Glacial Maximum. *Mol. Biol. Evol.* **29**, 707–719 (2012).
- Doadrio, I. & Perdices, A. Phylogenetic relationships among the Ibero-African cobitids (*Cobitis*, Cobitidae) based on cytochrome *b* sequence data. *Mol. Phylogenet. Evol.* **37**, 484–493 (2005).
- Dowling, T. E., Tibbets, C. A., Minckley, W. L. & Smith, G. R. Evolutionary relationships of the plagopterins (Teleostei: Cyprinidae) from cytochrome *b* sequences. *Copeia* **2002**, 665–678 (2002).
- He, D. K., Chen, Y. F., Chen, Y. Y. & Chen, Z. M. Molecular phylogeny of the specialized schizothoracine fishes (Teleostei: Cyprinidae), with their implications for the uplift of the Qinghai-Tibetan Plateau. *Chin. Sci. Bull.* **49**, 39-48. (2004).
- Ho, S. Y. W., Phillips, M. J., Cooper, A. & Drummond, A. J. Time dependency of molecular rate estimates and systematic overestimation of recent divergence times. *Mol. Biol. Evol.* **22**, 1561–1568 (2005).
- Kemp, B. M. *et al.* Genetic analysis of early Holocene skeletal remains from Alaska and its implications for the settlement of the Americas. *Am. J. Phys. Anthropol.* **132**, 605–621 (2007).
- Li, C. X. & Zhang, G. J. A sea running Changjiang River during the Last Glaciation? *Acta Geogr. Sin.* **50**, 459-462 (1995).
- Li, J., Wang, R. J. Paleoproductivity variability of the northern South China Sea during the past 1 Ma: The opal record from ODP site 1144. *Acta Geol. Sin.* **78**, 228-233 (2004).

- Li, J. Y. Quaternary diatoms from the South China Sea, leg 184, site 1144 and their palaeoenvironmental evolution. *Geol. Rev.* 48, 542-551 (2002).
- Lin, L. S., Yan, L. P., Ling, J. Z., Liu, Y. & Zhou, R. K. Food habits of hairtail in the East China Sea region. *Mar. Fish.* 27, 187-192 (2005).
- Martin, A. & Bermingham, E. Systematics and evolution of lower Central American cichlids inferred from analysis of cytochrome *b* gene sequences. *Mol. Phylogenet. Evol.* 9: 192-203 (1998).
- Santos, C. *et al.* Understanding differences between phylogenetic and pedigree-derived mtDNA mutation rate: a model using families from the Azores Islands (Portugal). *Mol. Biol. Evol.* 22, 1490–1505 (2005).
- Sun, X. J., Luo, Y. L., Huang, F., Tian, J. & Wang, P. X. Deep-sea pollen from the South China Sea: Pleistocene indicators of East Asian monsoon. *Mar. Geol.* 201, 97–118 (2003).
- Tang, D. L., Kawamura, H., Lee, M. A., Dien T. V. Seasonal and spatial distribution of chlorophyll-a concentrations and water conditions in the Gulf of Tonkin, South China Sea. *Remote Sens. Environ.* 85, 475–483 (2003).
- Tsigenopoulos, C. S., Durand, J. D., Ünü, E. & Berrebi, P. Rapid radiation of the Mediterranean *Luciobarbus* species (Cyprinidae) after the Messinian salinity crisis of the Mediterranean Sea, inferred from mitochondrial phylogenetic analysis. *Biol. J. Linn. Soc.* 80, 207–222 (2003).

- Wang, P. X. Cenozoic deformation and the history of sea-land interactions in Asia. in *Continent-Ocean Interactions in the East Asian Marginal Seas* (eds P. Clift, P. X. Wang, W. Kuhnt & Hayes D). *Geophysical Monograph* 149, 1-22 (AGU, 2004).
- Wang, P. X., Min, Q. B., Bian, Y. H. & Cheng, X. R. Strata of Quaternary transgressions in East China: A preliminary study. *Acta Geol. Sin.* 1, 1-13 (1981).
- Wang, P. X., Min, Q. B., Bian, Y. H. & Cheng, X. R. On micropaleontology and stratigraphy of Quaternary marine transgressions in East China. in *Marine Micropaleontology of China* (eds P. X. Wang ) 265-284 (China Ocean Press/Springer, Beijing/Berlin, 1985).
- Wang, P. X. *et al.* *Foraminifera and Ostracods in Bottom Sediment of the East China Sea.* (China Ocean Press, Beijing, 1988).
- Wang, R. J. *et al.* Quaternary biogenic opal records in the South China Sea: linkages to East Asian monsoon, global ice volume and orbital forcing. *Sci. China Earth Sci.* 50, 710-724 (2007).
- Wei, X. & Wu, C. Y. Holocene delta evolution and sequence stratigraphy of the Pearl River Delta in South China. *Sci. China Earth Sci.* **54**, 1523-1541. (2011).
- Yan, Y. R., Chen, J. L., Hou, G., Lu, H. S. & Jin, X. S. Feeding habits of *Trichiurus lepturus* in Beibu Gulf of the South China Sea. *Chin. J. Appl. Ecol.* **21**, 749-755 (2010).
- Yang, S. Y. *et al.* Burial of organic carbon in Holocene sediments of the Zhujiang (Pearl River) and Changjiang (Yangtze River) estuaries. *Mar. Chem.* **123**, 1-10 (2011).



- Yang, Z. G. Evolution of eastern shelf of China in Quaternary and its environmental consequences. In *Symposium on Correlation of Onshore and Offshore Quaternary in China*. (eds M. S. Liang & J. L. Zhang) 1-22 (Science Press, Beijing, 1991).
- Zhao, S. L., Zhang, H. C., Huang, Q. F. & Cang, S. X. Paleogeographic change of Yangtze River delta region since the late Pliocene. *Mar. Geol. Quat. Geol.* **3**, 35-45 (1983).
- Zhao, S. L. On the Quaternary geological problem of Changjiang (Yangtze River) delta region. *Mar. Sci.* (5), 15-20 (1984).
- Zhong, D. L., Shen, X. Z., Xia, D. X. & Liu, Z. X. Explanation of satellite photography of the ancient Changjiang delta region in early Holocene. *Mar. Sci* (2): 16-17 (1983).
- Zhu, Y. Q., Zeng, C. K. & Feng, Y. The shelf geomorphic features of the East China Sea. *Donghai Mar. Sci.* **2**, 1-13 (1984).
